# Supplementary material
Source: PubMed Central journal article supplement (PMC3107268)
Supplement: 1106363108_pnas.201106363SI.pdf [file 1106363108_pnas.201106363SI.pdf]

# Supporting Information

Liebeskind et al. 10.1073/pnas.1106363108

## SI Materials and Methods

**Gene Sequencing.** There were two notable differences between the *Monosiga* reference sequence and our mRNA sequence (Fig. S1). First, the beginning of the ORF did not align with the reference. We took the first methionine to be the beginning of the ORF, but because we did not find any stop codons at the beginning of our sequence, we cannot exclude the possibility that there is an earlier methionine that we did not find, or that a later one begins the actual protein. Second, we found 125 bp of sequence that was not identified in our BLAST analysis. This sequence was in the Joint Genome Institute (JGI)'s *M. brevicollis* genome, but was classified as an intron. However, as we located this sequence in the mRNA, and because the translation remained in frame, we believe it is an exon that was misclassified by the BLAST analysis and is called the missing exon in this alignment. The rest of the alignment had very few differences, none of which threw the sequence out of frame.

**Phylogenetic Methods.** Besides the tree we report here, we also made maximum likelihood (ML) trees using Garli (1) with datasets that excluded the sponge and ctenophore sequences, which yielded completely consistent results. Analyses that further excluded two sodium channel genes (*Trichoplax*  $\beta$  and *Nematostella*  $\beta$ , which are relatively divergent), and a partially sequenced calcium channel (*Monosiga* Ca<sub>v</sub>) using two different programs, Garli and SATe (2), yielded consistent results as well. We have used several different masking schemes throughout these analyses. These include masking with Guidance (3), as in the reported tree; removing the fast evolving cytoplasmic loops; and running the analyses without any masking. These different schemes can affect the exact placement of D/E/E/A channels within Bilateria and Cnidaria, indicating low phylogenetic signal in these channels, but does not affect the main conclusions of the paper. The *Monosiga* Na<sub>v</sub> homolog always grouped with the Na<sub>v</sub> family and ancestral state reconstruction was not affected.

**Metazoan Phylogeny.** A careful reanalysis of previous studies that had suggested nontraditional placements for basal groups finds that some of the inconsistencies regarding the basal placement of sponges can be resolved by removing genes of dubious orthology from alignments or increasing the taxon sampling (4). Doing so returns sponges to a basal position in the animal lineage and cnidarians to a sister group relation with bilaterians, a result which also agrees with the phylogenies in the *Trichoplax* and *Amphimedon* genome papers (5, 6). The revised phylogenies are not well supported, however, revealing low phylogenetic signal (4). The

precise placement of ctenophores and placozoans is even less certain in these analyses, and one or the other group is left out of several studies (5–7). However, Philippe et al. (4) proposed that ctenophores should provisionally be placed in a group with cnidarians, with placozoans being sister to this group plus bilaterians. They call the group of animals with nervous systems “Eumetazoa,” which contrasts with Srivastava et al. (6) who use this word to mean all animals with nervous systems plus *Trichoplax* (i.e., all animals except sponges). Knowing the precise placement of ctenophores and placozoans is critical because ctenophores have a fully developed nervous system, whereas *Trichoplax* has the simplest animal body plan. It is not possible to give a satisfying account of the evolution of the nervous system, or animal complexity in general, without knowing the phylogenetic positions of these groups.

**PCR Primers.** The following pairs of primers were used to amplify the *Monosiga brevicollis* gene segments during PCRs, with lower primers reported in their antisense form:

Segment 1 RT: 3'-GCGGAACCGGGGTCAAGGGC-5'. Primers: 5'-TTTTGTCGTCTTTATCATTTTTGGC-3' and 3'-TCACTTTCTAGAAGATTGCACACGT-5'.

Segments 2 and 3 RT: 3'-GCGGAACCGGGGTCAAGGGC-5'.

Segment 2 primers: 5'-GAGTGGATTGAACTTCTATGGG-AGA-3' and 3'-TTGAGTCCGATACACCCTATGATAA-5'.

Segment 3 primers: 5'-ATGCATCCCTGCCCAAGCGCGC-3', 3'-CTCGTTCAGTACAATGGGCGTAGA-5'.

Segment 4 RT: 3'-GATGATTCAACGATGGACA-5'. Primers: 5'-TCGGAAGTTTGGTCAGACTGAGCCC-3' and 3'-TCCACCAGATGCAAAGTAGGAACG-5'.

The upper primer used in the third segment was designed from the putative beginning of the ORF, but actually bound further toward the 3' end of the gene. It was later revealed that the part of the gene that this primer was designed from did not match the reference sequence, so the upper primer from the third segment should not be used.

The following primers were used to sequence ~1,000 bp from both *Trichoplax* genes:

*Trichoplax*  $\alpha$  RT: 3'-CAACTAATGCTTCTAAAACG-5'. Primers: 5'-TTGGATCTTTTTTCTCATTAAACCT-3' and 3'-CATGAAAATGCTGTCGCTGAGTTAT-5'.

*Trichoplax*  $\beta$  RT: 3'-GAGAGTAAAAAAGGTGCCAA-5'. Primers: 5'-ATCAGTCTTCAAGGCCACGACTTAC-3' and 3'-TGCCATGTTAAGCCATTATCTAAAC-5'.

1. Zwickl DJ (2006) Genetic algorithm approaches for the phylogenetic analysis of large biological sequence datasets under the maximum likelihood criterion. PhD dissertation (University of Texas, Austin, TX).
2. Liu K, Raghavan S, Nelesen S, Linder CR, Warnow T (2009) Rapid and accurate large-scale coestimation of sequence alignments and phylogenetic trees. *Science* 324: 1561–1564.
3. Penn O, et al. (2010) Guidance: A web server for assessing alignment confidence scores. *Nucleic Acids Res* 38:W23–W28.

4. Philippe H, et al. (2011) Resolving difficult phylogenetic questions: Why more sequences are not enough. *PLoS Biol* 9:e1000602.
5. Srivastava M, et al. (2008) The *Trichoplax* genome and the nature of placozoans. *Nature* 454:955–960.
6. Srivastava M, et al. (2010) The *Amphimedon queenslandica* genome and the evolution of animal complexity. *Nature* 466:720–726.
7. Dunn CW, et al. (2008) Broad phylogenomic sampling improves resolution of the animal tree of life. *Nature* 452:745–749.



**Table S1. Accession numbers for the genes used in the phylogenetic analysis**

|                 | Channel                              | Accession number/protein ID | Database          |
|-----------------|--------------------------------------|-----------------------------|-------------------|
| T type          | <i>Homo</i>                          | O95180.4                    | Swiss-Prot        |
|                 | <i>Ciona</i>                         | 269719                      | JGI-Genome Portal |
|                 | <i>Helobdella</i>                    | 66349                       | JGI-Genome Portal |
|                 | <i>Drosophila</i>                    | NM_001103419.1              | RefSeq            |
|                 | <i>Strongylocentrotus</i>            | GLEAN3_25833                | SpBase            |
|                 | <i>Lymnea</i>                        | AAO83843.1                  | GenBank           |
|                 | <i>Caenorhabditis</i>                | WP:CE36117                  | WormBase          |
|                 | <i>Nematostella</i>                  | 170705                      | JGI-Genome Portal |
|                 | <i>Trichoplax</i>                    | 21513                       | JGI-Genome Portal |
| N/P/Q           | <i>Homo</i> P/Q                      | O00555.2                    | Swiss-Prot        |
|                 | <i>Homo</i> N                        | O55017.1                    | Swiss-Prot        |
|                 | <i>Strongylocentrotus</i>            | GLEAN3_11692                | SpBase            |
|                 | <i>Schistosoma</i>                   | AAK84313.1                  | GenBank           |
|                 | <i>Caenorhabditis</i>                | WP:CE31225                  | WormBase          |
|                 | <i>Nematostella</i>                  | 59997                       | JGI-Genome Portal |
|                 | <i>Trichoplax</i>                    | 53006                       | JGI-Genome Portal |
|                 | <i>Mnemiopsis</i>                    | JF905561                    | GenBank           |
| L type          | <i>Oryctolagus</i>                   | P15381.1                    | Swiss-Prot        |
|                 | <i>Ciona</i>                         | 239620                      | JGI-Genome Portal |
|                 | <i>Helobdella</i>                    | 128998                      | JGI-Genome Portal |
|                 | <i>Caenorhabditis</i>                | WP:CE31165                  | WormBase          |
|                 | <i>Drosophila</i>                    | NM_080365.2                 | RefSeq            |
|                 | <i>Strongylocentrotus</i>            | GLEAN3_07770                | SpBase            |
|                 | <i>Nematostella</i>                  | 88037                       | JGI-Genome Portal |
|                 | <i>Stylophora</i>                    | AAD11470.1                  | GenBank           |
|                 | <i>Cyanea</i>                        | AAC63050.1                  | GenBank           |
|                 | <i>Trichoplax</i>                    | 18642                       | JGI-Genome Portal |
| Other           | <i>Monosiga</i>                      | 23875                       | JGI-Genome Portal |
|                 | <i>Amphimedon</i>                    | 228755                      | Metazome          |
| Na <sub>v</sub> | <i>Mus</i> 1.4 Na <sub>v</sub> 1     | NM_133199.2                 | RefSeq            |
|                 | <i>Xenopus</i> 1.6 Na <sub>v</sub> 1 | 464193                      | JGI-Genome Portal |
|                 | <i>Homo</i> 1.6 Na <sub>v</sub> 1    | NM_014191.2                 | RefSeq            |
|                 | <i>Ciona</i> Na <sub>v</sub> 1       | 249763                      | JGI-Genome Portal |
|                 | <i>Halocynthia</i> Na <sub>v</sub> 1 | 662385                      | NCBI              |
|                 | <i>Lottia</i> Na <sub>v</sub> 1      | 177540                      | JGI-Genome Portal |
|                 | <i>Helobdella</i> Na <sub>v</sub> 1  | 109965                      | JGI-Genome Portal |
|                 | <i>Drosophila</i> Na <sub>v</sub> 1  | 150421666                   | NCBI              |
|                 | <i>Daphnia</i> Na <sub>v</sub> 1     | 50283                       | JGI-Genome Portal |
|                 | <i>Halocynthia</i> Na <sub>v</sub> 2 | 8096345                     | NCBI              |
|                 | <i>Ciona</i> Na <sub>v</sub> 2       | 259743                      | JGI-Genome Portal |
|                 | <i>Strongylocentrotus</i>            | GLEAN3_25997                | SpBase            |
|                 | <i>Lottia</i> Na <sub>v</sub> 2      | 161240                      | JGI-Genome Portal |
|                 | <i>Daphnia</i> Na <sub>v</sub> 2     | 40660                       | JGI-Genome Portal |
|                 | <i>Drosophila</i> Na <sub>v</sub> 2  | 166215092                   | NCBI              |
|                 | <i>Polyorchus</i>                    | 3005564                     | NCBI              |
|                 | <i>Cyanea</i>                        | 994814                      | NCBI              |
|                 | <i>Nematostella</i> α                | 122010                      | JGI-Genome Portal |
|                 | <i>Aiptasia</i>                      | 2791840                     | NCBI              |
|                 | <i>Nematostella</i> β                | 88459                       | JGI-Genome Portal |
|                 | <i>Trichoplax</i> β                  | 54699                       | JGI-Genome Portal |
|                 | <i>Trichoplax</i> α                  | 23340                       | JGI-Genome Portal |
|                 | <i>Mnemiopsis</i> α                  | JF905562                    | GenBank           |
|                 | <i>Mnemiopsis</i> β                  | JF905563                    | GenBank           |
|                 | <i>Monosiga</i>                      | JF827087                    | GenBank           |
| Fungi           | <i>Saccharomyces</i>                 | 1323391                     | NCBI              |
|                 | <i>Aspergillus</i>                   | 55835                       | JGI-Genome Portal |
